# Supplementary material for: A bioactivated in vivo assembly nanotechnology fabricated NIR probe for small pancreatic tumor intraoperative imaging
Source: PubMed Central journal article supplement (PMC8776730; doi:10.1038/s41467-021-27932-y), 2022-01-20
Supplement: 41467_2021_27932_MOESM1_ESM.pdf [file 41467_2021_27932_MOESM1_ESM.pdf]

# Supplementary Materials for

## **A bioactivated *in vivo* assembly nanotechnology fabricated NIR probe for small pancreatic tumor intraoperative imaging**

Han Ren<sup>1‡</sup>, Xiang-Zhong Zeng<sup>1,2,3‡</sup>, Xiao-Xiao Zhao<sup>1‡</sup>, Da-yong Hou<sup>1,4,5</sup>, Haodong Yao<sup>6</sup>, Muhammad Yaseen<sup>7</sup>, Lina Zhao<sup>6</sup>, Wan-hai Xu<sup>4,5</sup>, Hao Wang<sup>1</sup>, and Li-Li Li<sup>1\*</sup>

<sup>1</sup> CAS Center for Excellence in Nanoscience, CAS Key Laboratory for Biological Effects of Nanomaterials and Nanosafety, National Center for Nanoscience and Technology (NCNST), 100190 Beijing, China.

<sup>2</sup> Center of Materials Science and Optoelectronics Engineering, University of Chinese Academy of Sciences (UCAS), 100049 Beijing, China.

<sup>3</sup> Academy for Advanced Interdisciplinary Studies, Peking University, 100871 Beijing, China.

<sup>4</sup> Department of Urology, The Fourth Hospital of Harbin Medical University, Heilongjiang Key Laboratory of Scientific Research in Urology, 150001 Harbin, China.

<sup>5</sup> NHC Key Laboratory of Molecular Probes and Targeted Diagnosis and Therapy, Harbin Medical University, Harbin, 150001, China.

<sup>6</sup> Institute of High Energy Physics, Chinese Academy of Sciences (CAS), 100049 Beijing, China.

<sup>7</sup> Institute of Chemical Sciences, University of Peshawar, 25120, KP, Pakistan.

<sup>‡</sup> H. Ren, X.-Z. Zeng, and X.-X. Zhao contributed equally to this work.

\*Corresponding author. Email: [lill@nanoctr.cn](mailto:lill@nanoctr.cn)

**This PDF file includes:**

Supplementary Table 1 and Figs. 1-28

# Content

|                                                                                                                                                                              |    |
|------------------------------------------------------------------------------------------------------------------------------------------------------------------------------|----|
| <b>Supplementary Table 1</b>   Secondary structure proportions of <b>M1</b> , <b>M3</b> and <b>R-M1</b> calculated by Reed's Reference based on CD spectra.....              | 1  |
| <b>Supplementary Fig. 1</b>   Chemical structure and synthesis of <b>M1</b> : mPEG-GPAKLVFFGC(IR783)GRGD:.....                                                               | 2  |
| <b>Supplementary Fig. 2</b>   Chemical structure and mass spectra of <b>M1</b> : mPEG-GPAKLVFFGC(IR <sub>783</sub> )GRGD.....                                                | 3  |
| <b>Supplementary Fig. 3</b>   Chemical structure and mass spectra of <b>M2</b> : mPEG-AGGKLVFFGC(IR <sub>783</sub> )GRGD.....                                                | 4  |
| <b>Supplementary Fig. 4</b>   <b>Chemical</b> structure and mass spectra of <b>M3</b> : mPEG-GPAKLVFFGCGRGD.....                                                             | 5  |
| <b>Supplementary Fig. 5</b>   <b>Chemical</b> structure and mass spectra of <b>R-M1</b> : AKLVFFGC(IR <sub>783</sub> )GRGD.....                                              | 6  |
| <b>Supplementary Fig. 6</b>   <b>Chemical</b> structure and mass spectra of <b>M4</b> : mPEG-GPAKLVFFGC(IR <sub>783</sub> )GDTG.....                                         | 7  |
| <b>Supplementary Fig. 7</b>   Chemical structure and mass spectra of <b>M5</b> : mPEG-AGGKLVFFGCGRGD.....                                                                    | 8  |
| <b>Supplementary Fig. 8</b>   Chemical structure and mass spectra of <b>R-M3</b> : AKLVFFGCGRGD.....                                                                         | 9  |
| <b>Supplementary Fig. 9</b>   The critical aggregation concentration (CAC) of <b>M3</b> and <b>M5</b> .....                                                                  | 10 |
| <b>Supplementary Fig. 10</b>   The critical aggregation concentration (CAC) of <b>R-M3</b> and <b>R-M1</b> .....                                                             | 11 |
| <b>Supplementary Fig. 11</b>   The radius of gyration (RGYR) (a) and root mean square fluctuation (RMSF) (b) of AKLVFFGCGRGD sequences of <b>M1</b> and <b>R-M1</b> .....    | 12 |
| <b>Supplementary Fig. 12</b>   The ANS staining dynamic fibril growth curve of <b>R-M1</b> .....                                                                             | 13 |
| <b>Supplementary Fig. 13</b>   The TEM image of self-assembled $\beta$ -sheet nanofibers of <b>M1</b> (100 $\mu$ M) after tailoring by FAP- $\alpha$ in buffer for 12 h..... | 14 |
| <b>Supplementary Fig. 14</b>   HPLC curve of <b>M3</b> co-incubated with inactivated FAP- $\alpha$ for 12h.....                                                              | 15 |
| <b>Supplementary Fig. 15</b>   The TEM image of <b>M1</b> co-incubated with Miapaca-2 cell lysis for 12 h.....                                                               | 16 |
| <b>Supplementary Fig. 16</b>   TEM image of <b>M1</b> co-incubated with inactivated FAP- $\alpha$ for 12h.....                                                               | 17 |
| <b>Supplementary Fig. 17</b>   MALDI-TOF mass spectra of <b>M1</b> co-incubated with Miapaca-2 cell lysis for 2 h.....                                                       | 18 |
| <b>Supplementary Fig. 18</b>   Representative confocal images in three independ experiment of <b>M1</b> with BIVA effect on Miapaca-2 cells after incubation for 2 h.....    | 19 |
| <b>Supplementary Fig. 19</b>   CLSM images of Miapaca-2 cells treated under different conditions.....                                                                        | 21 |

|                                                                                                                                                                           |    |
|---------------------------------------------------------------------------------------------------------------------------------------------------------------------------|----|
| <b>Supplementary Fig. 20</b>   The quantitative results of the migrated cells after treatment of PBS (blank), <b>M2</b> , <b>M3</b> and <b>M1</b> .....                   | 22 |
| <b>Supplementary Fig. 21</b>   Cell viability assay of Miapaca-2 cells treated with a series concentration of <b>M1</b> and <b>M2</b> for 24 h.....                       | 23 |
| <b>Supplementary Fig. 22</b>   3D reconstruction PA images of tumor-bearing mice injected with <b>M1</b> (16 mg/kg) through tail vein.....                                | 24 |
| <b>Supplementary Fig. 23</b>   Images of <b>M1</b> and <b>M2</b> molecules <i>in situ</i> in nude mice with pancreatic cancer were measured at 12 h post injection.....   | 25 |
| <b>Supplementary Fig. 24</b>   The <i>in vivo</i> and <i>in situ</i> NIR images of orthotopic pancreatic tumors by <b>M1</b> and <b>M2</b> ,.....                         | 26 |
| <b>Supplementary Fig. 25</b>   The 3D quantitative fluorescence intensity distribution of small size <i>ex vivo</i> orthotopic pancreatic tumor images of <b>M1</b> ..... | 27 |
| <b>Supplementary Fig. 26</b>   The congo red stained of tumor histologic section in mice treated with <b>M1</b> and <b>M2</b> .....                                       | 28 |
| <b>Supplementary Fig. 27</b>   Fluorescence images of tumor histologic section treated with <b>M1</b> (16 mg/kg) for 48 h.....                                            | 29 |
| <b>Supplementary Fig. 28</b>   The congo red tumor stained histologic section in mice treated with <b>M1</b> (16 mg/kg) for 48 h.....                                     | 30 |

**Supplementary Table 1** | Secondary structure proportions of **M1**, **M3** and **R-M1** calculated by Reed's Reference based on CD spectra.

|        | M1     | M3   | R-M1   |
|--------|--------|------|--------|
| Helix  | 0      | 45   | 0.5    |
| Beta   | 32.2   | 38.7 | 72     |
| Turn   | 1.7    | 0    | 27.5   |
| Random | 66.1   | 16.3 | 0      |
| RMS    | 14.093 | 5.66 | 23.908 |

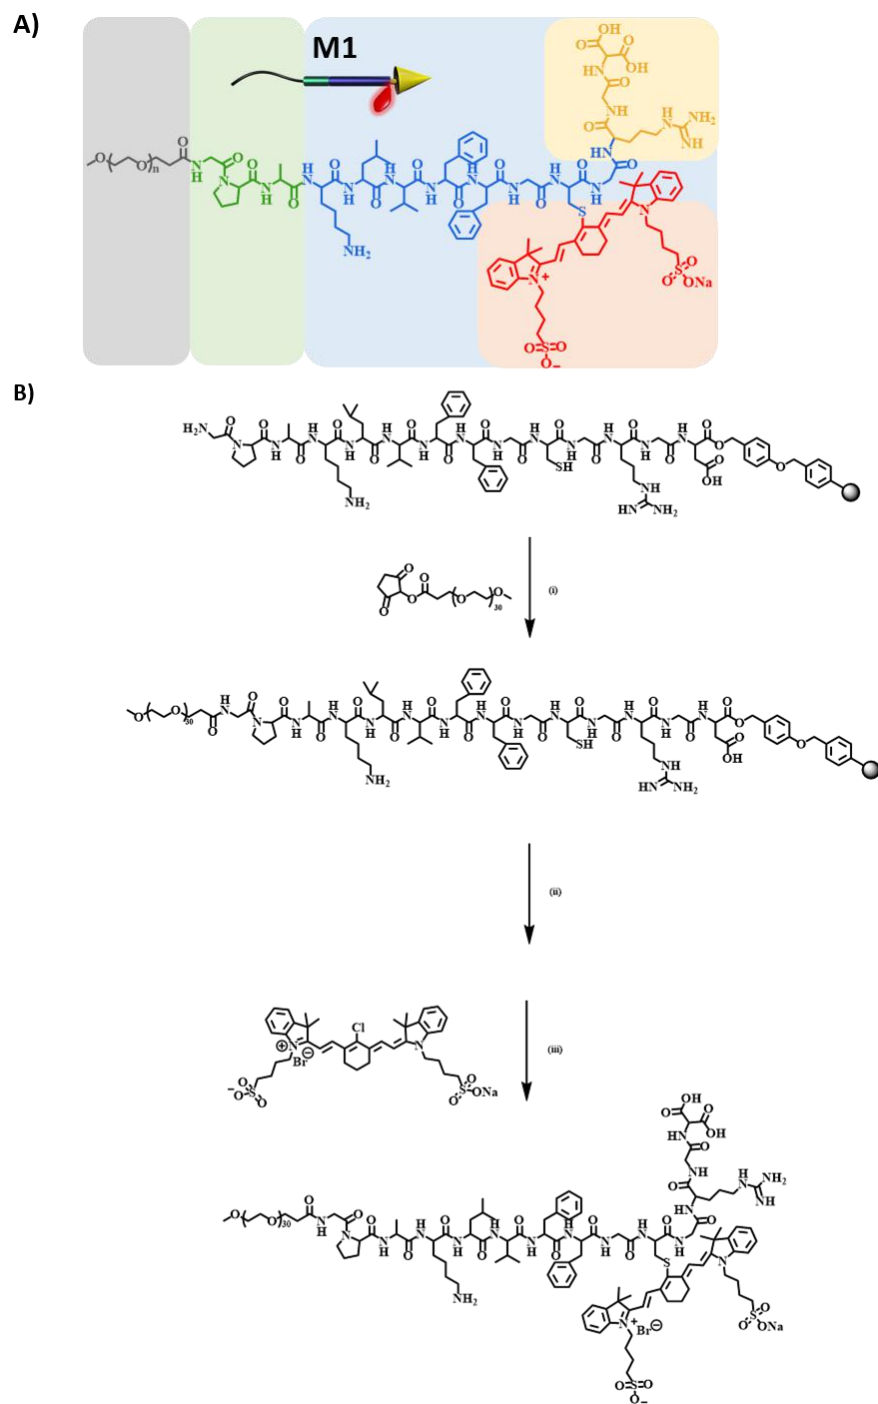

**Supplementary Fig. 1** | A) Chemical structure of **M1**: mPEG-GPAKLVFFGC(IR783)GRGD. B) Synthesis of **M1**: (i). 5% NMM/DMF, 10equiv. HBTU, pH9.0, 24h. (ii). TFA/TIPS/1,2-ethanedithiol/Diwater (92.5%/2.5%/2.5%/2.5%, v/v), stirring, ice bath, 3h. (iii). Tris buffer, pH8.5, 12h.

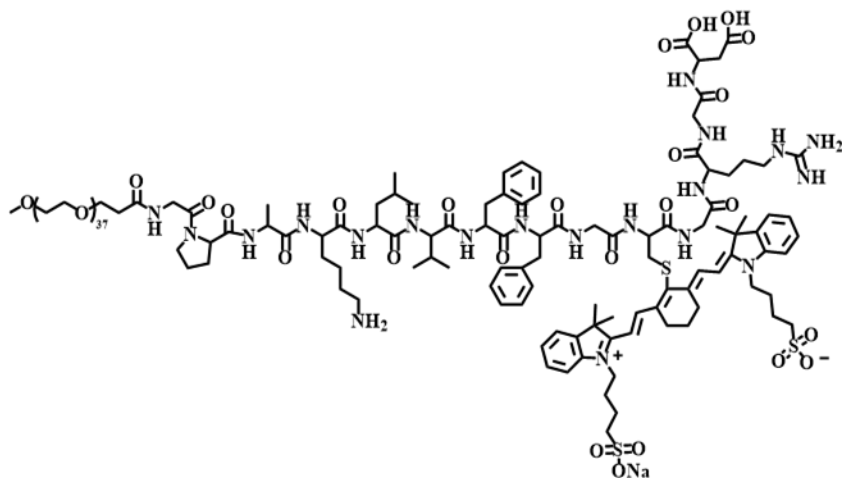

**M1** : mPEG-GPAKLVFFGC(IR783)GRGD

[M+H]<sup>+</sup> : 3863

3775

*Calcd.*: 3862.5

3731

3907

4039

3687

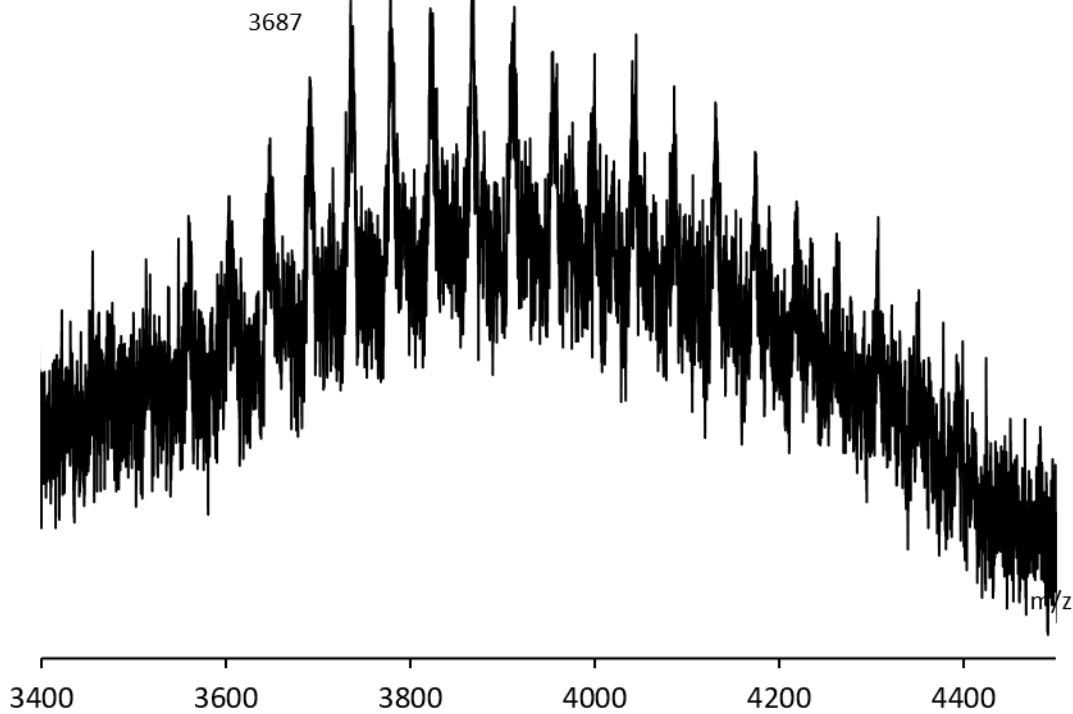

**Supplementary Fig. 2** | Chemical structure and MALDI-TOF mass spectra of **M1**: mPEG-GPAKLVFFGC(IR<sub>783</sub>)GRGD.

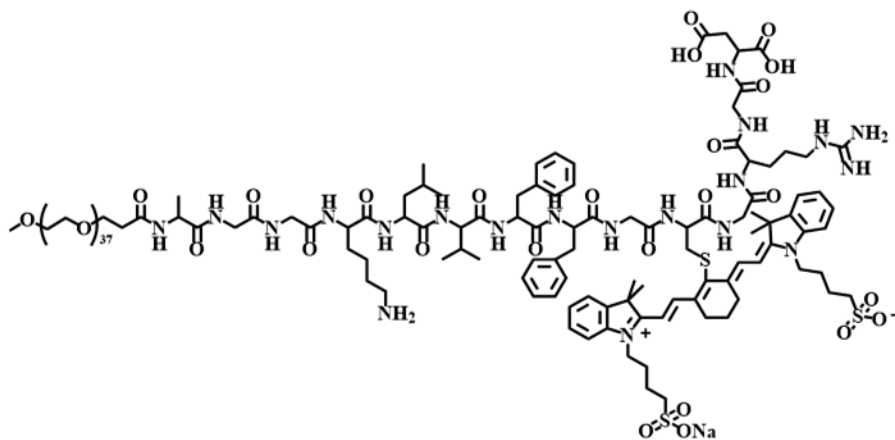

**M2:** mPEG-AGGKLVFFGC(IR783)GRGD

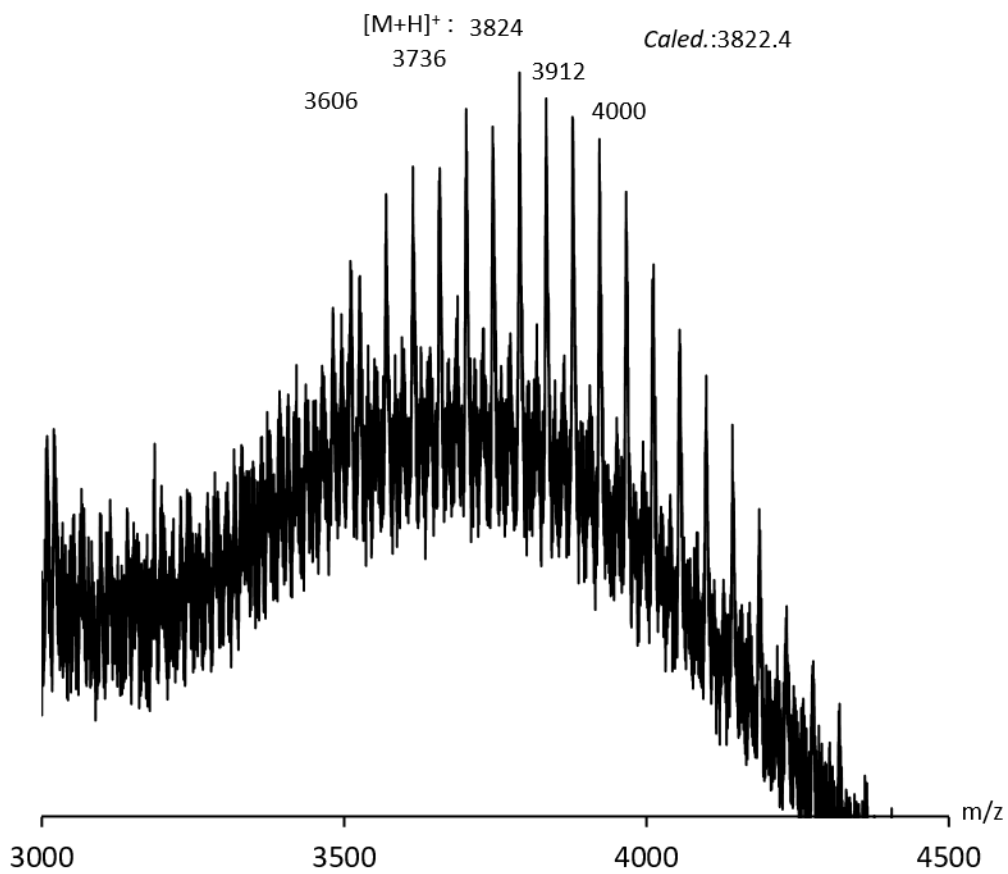

**Supplementary Fig. 3** | Chemical structure and MALDI-TOF mass spectra of **M2**: mPEG-AGGKLVFFGC(IR<sub>783</sub>)GRGD.



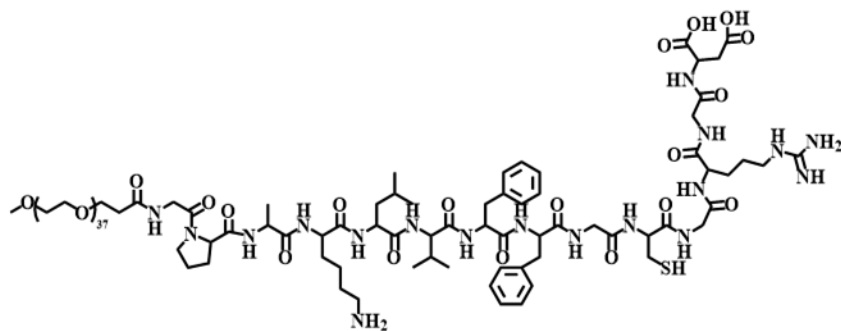

**M3:** mPEG-GPAKLVFFGCGRGD

*Calcd.:* 3148.5

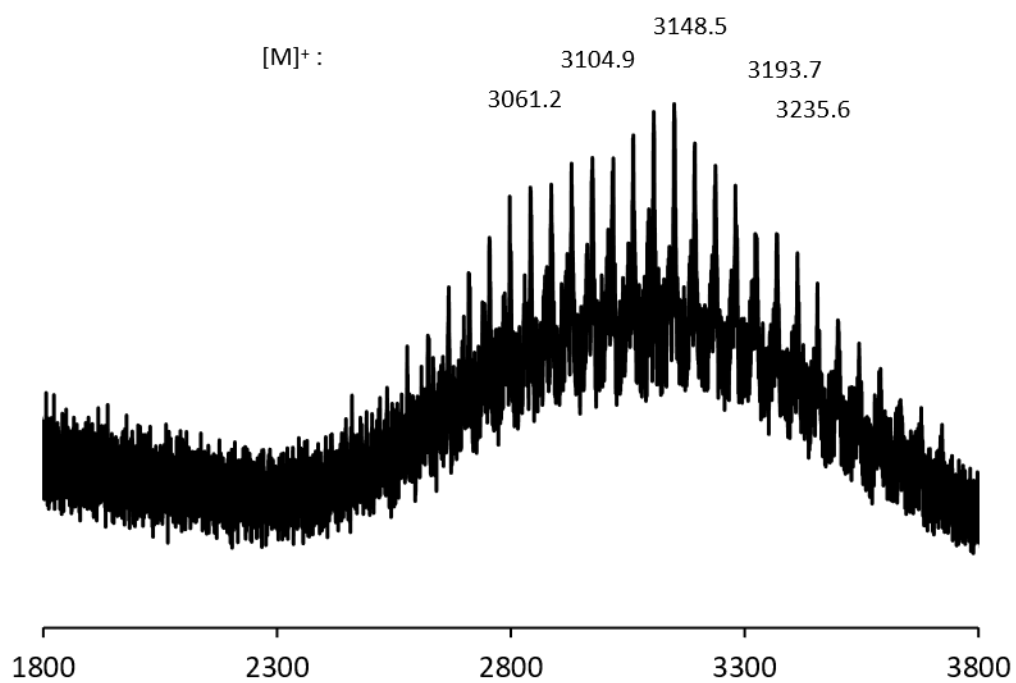

**Supplementary Fig. 4 |** Chemical structure and MALDI-TOF mass spectra of **M3:** mPEG-GPAKLVFFGCGRGD.

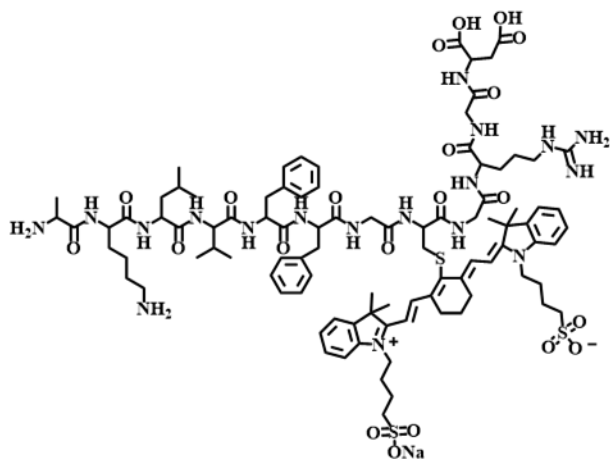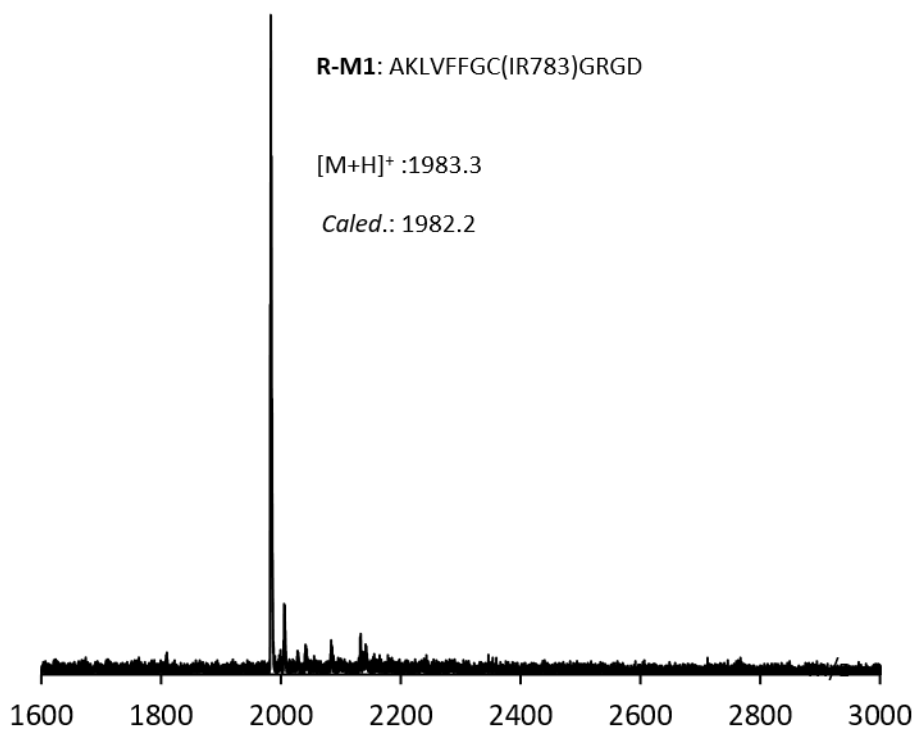

**Supplementary Fig. 5 | Chemical structure and MALDI-TOF mass spectra of R-M1: AKLVFFGC(IR<sub>783</sub>)GRGD.**

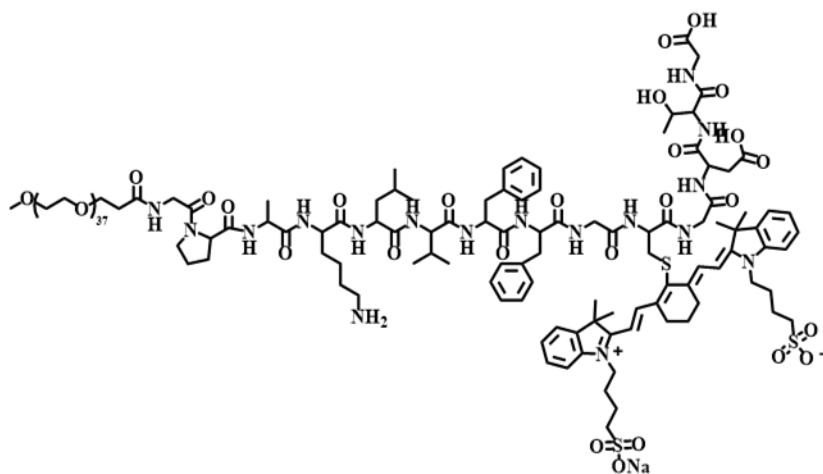

**M4:** mPEG-GPAKLVFFGC(IR783)GDTG

*Calcd.:* 3823.1

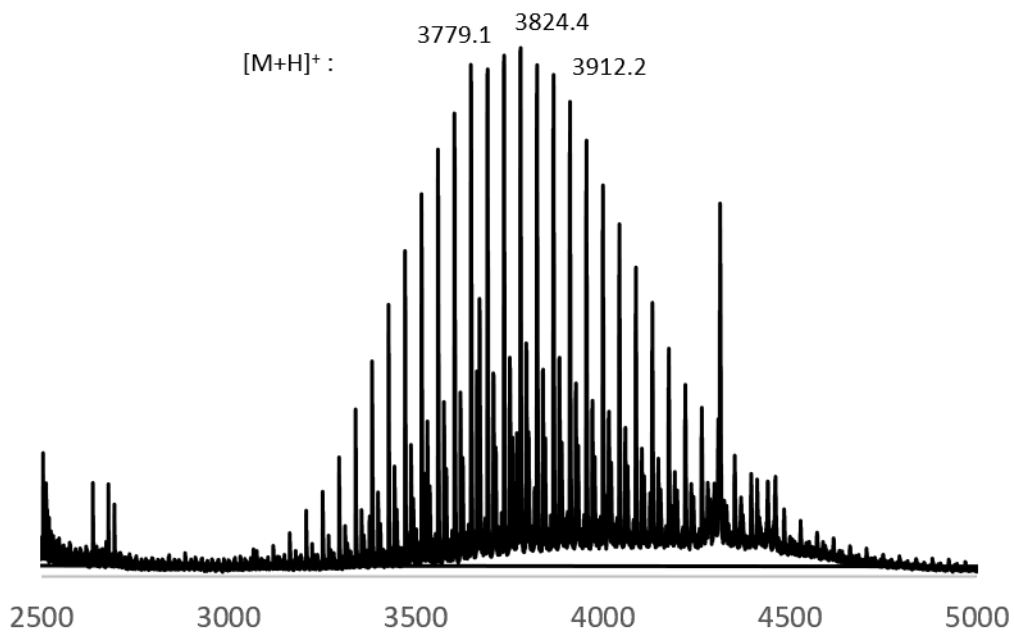

**Supplementary Fig. 6** | Chemical structure and MALDI-TOF mass spectra of **M4:** mPEG-GPAKLVFFGC(IR<sub>783</sub>)GDTG.

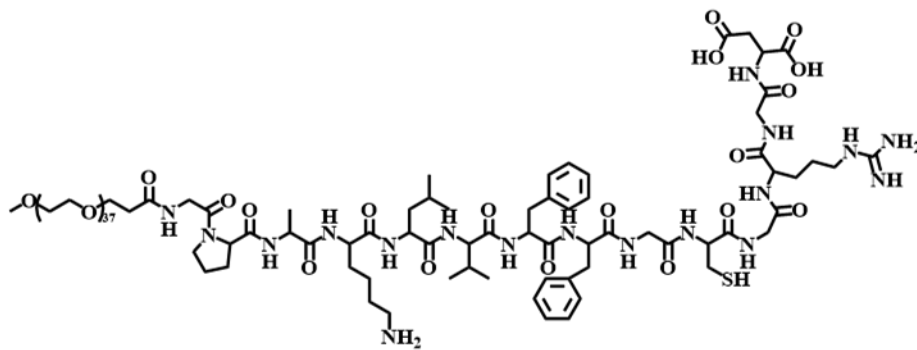

**M5** : mPEG-AGGKLVFFGCGRGD

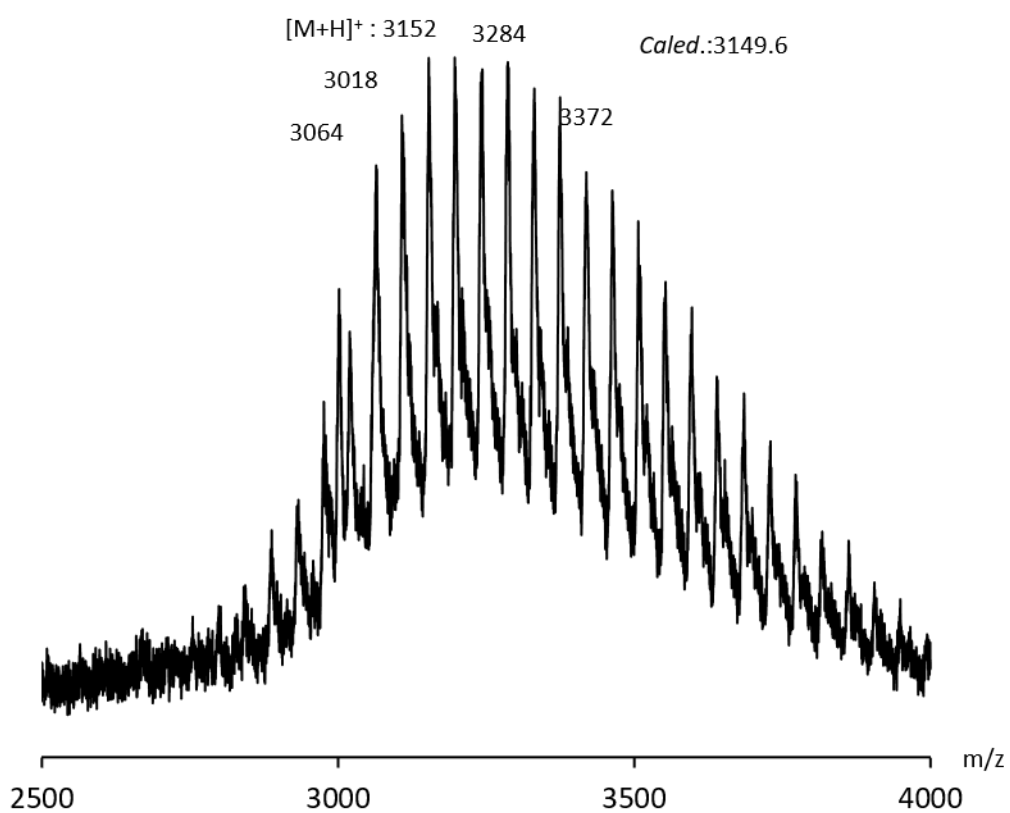

**Supplementary Fig. 7** | Chemical structure and MALDI-TOF mass spectra of **M5**: mPEG-AGGKLVFFGCGRGD.



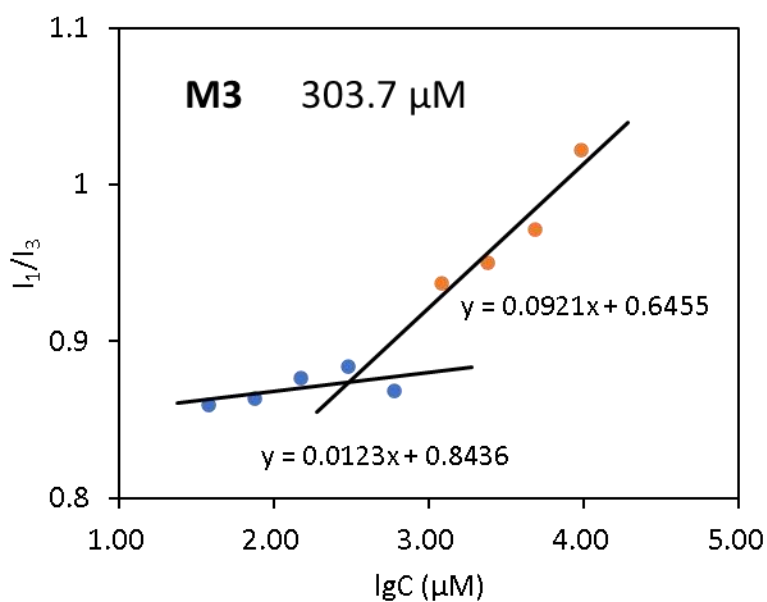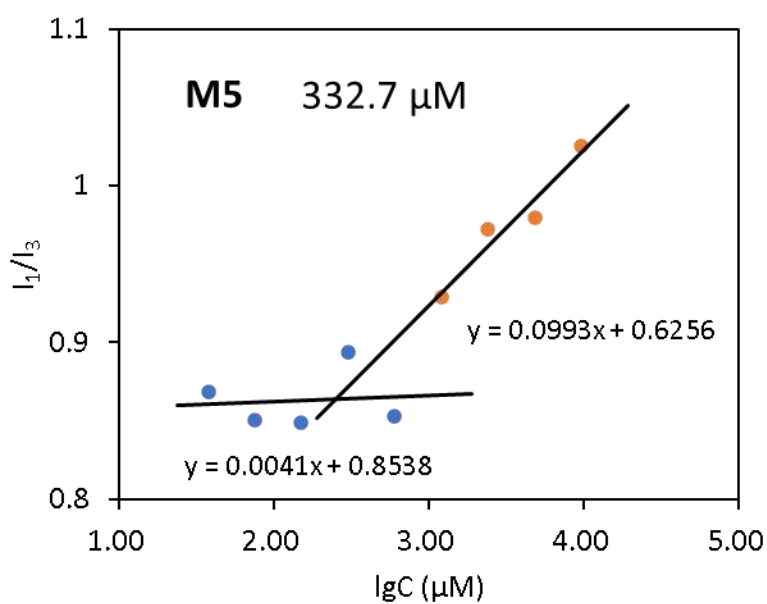

**Supplementary Fig. 9** | The critical aggregation concentration (CAC) of **M3** and **M5** was measured by using pyrene as a probe. The ratio of peak  $I_1$  to peak  $I_3$  can be obtained by measuring the fluorescence of pyrene in different concentrations of molecules. Experiments were repeated three times. The x axis is logarithm concentration and the y axis is the ratio of peak intensities of 374 nm and 383 nm. Ex= 334 nm.

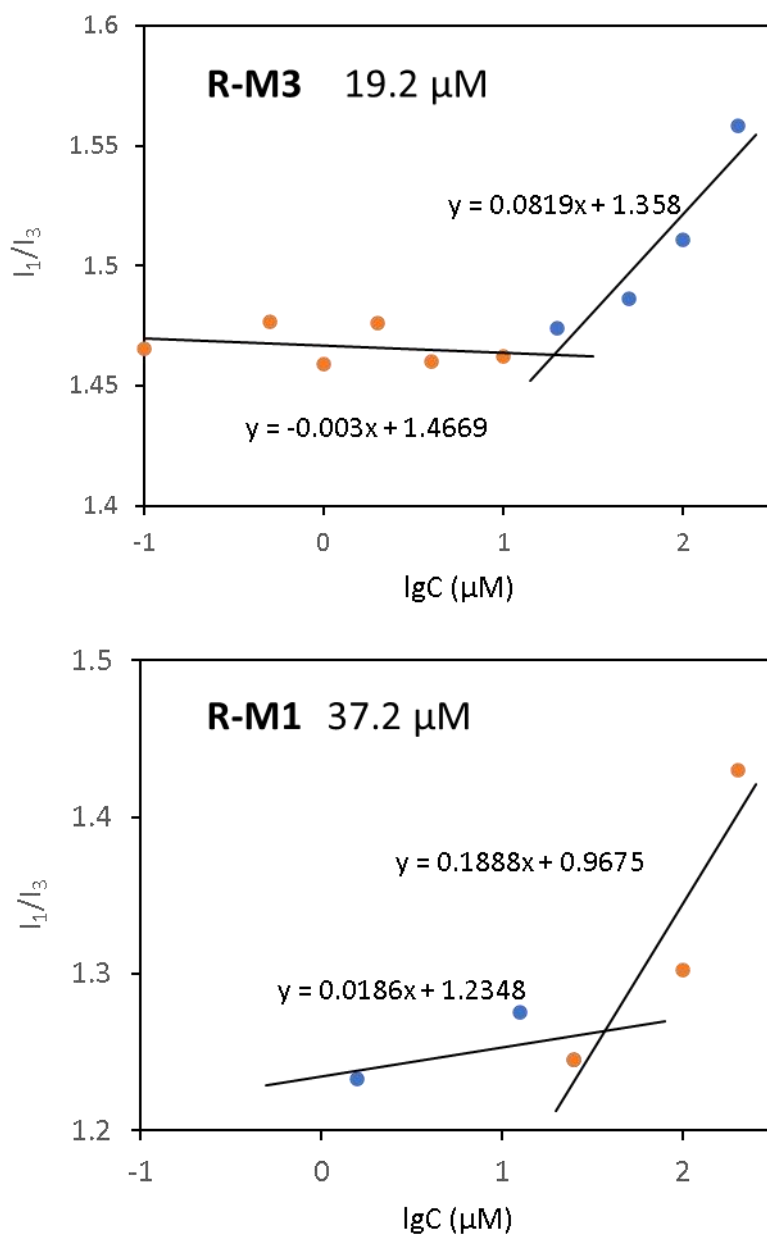

**Supplementary Fig. 10** | The critical aggregation concentration (CAC) of **R-M3** and **R-M1** was measured by using pyrene as a probe. The ratio of peak  $I_1$  to peak  $I_3$  can be obtained by measuring the fluorescence of pyrene in different concentrations of molecules. To figure out the CAC of the molecule. Experiments were repeated three times. The x axis is logarithm concentration and the y axis is the ratio of peak intensities of 374 nm and 383 nm.  $\lambda_{\text{ex}} = 334 \text{ nm}$ .

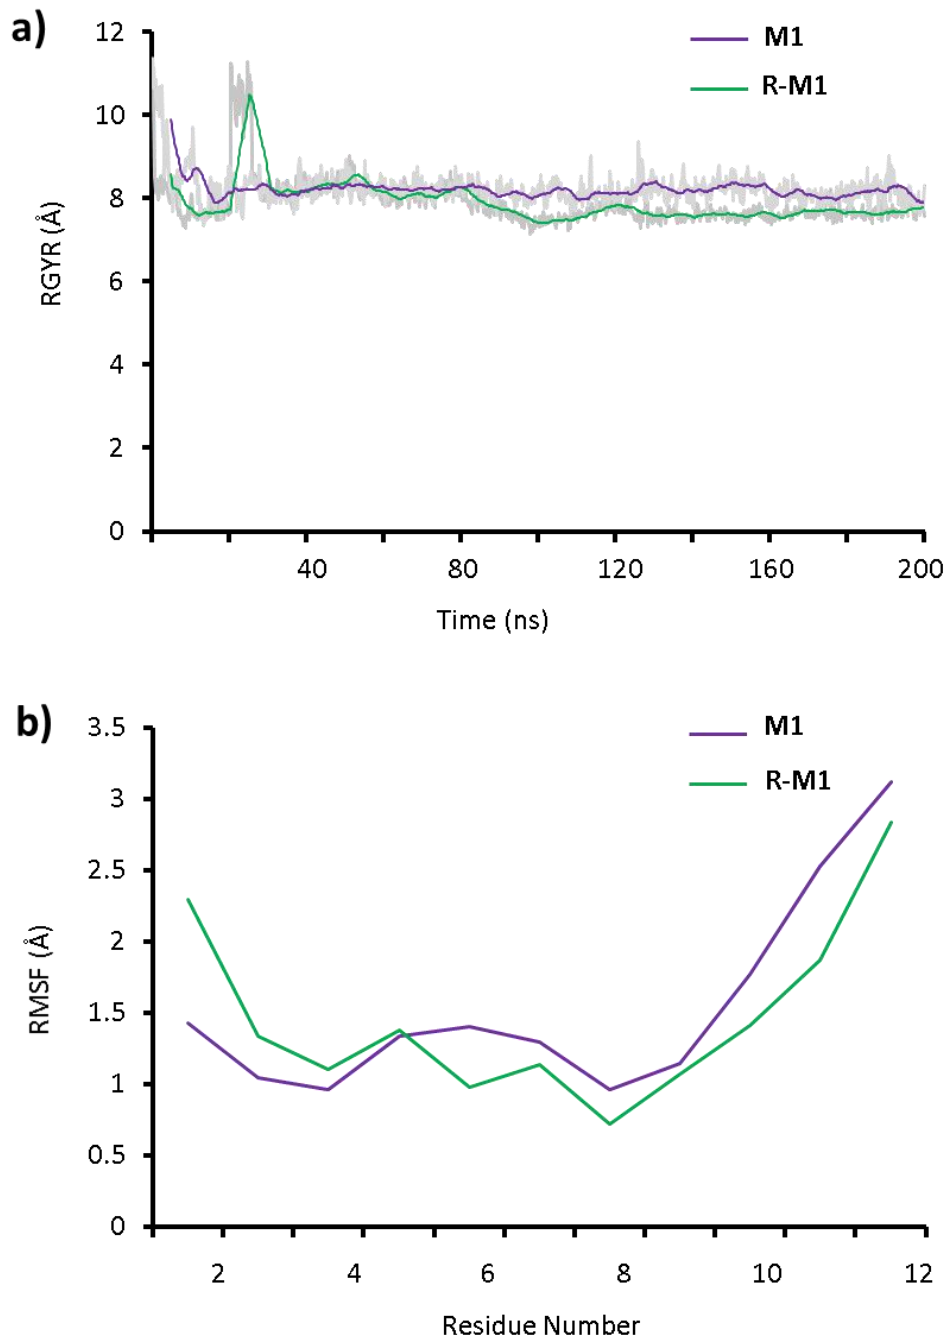

**Supplementary Fig. 11** | The radius of gyration (RGYR) (a) and root mean square fluctuation (RMSF) (b) of AKLVFFGCGRGD sequences of **M1** and **R-M1**.



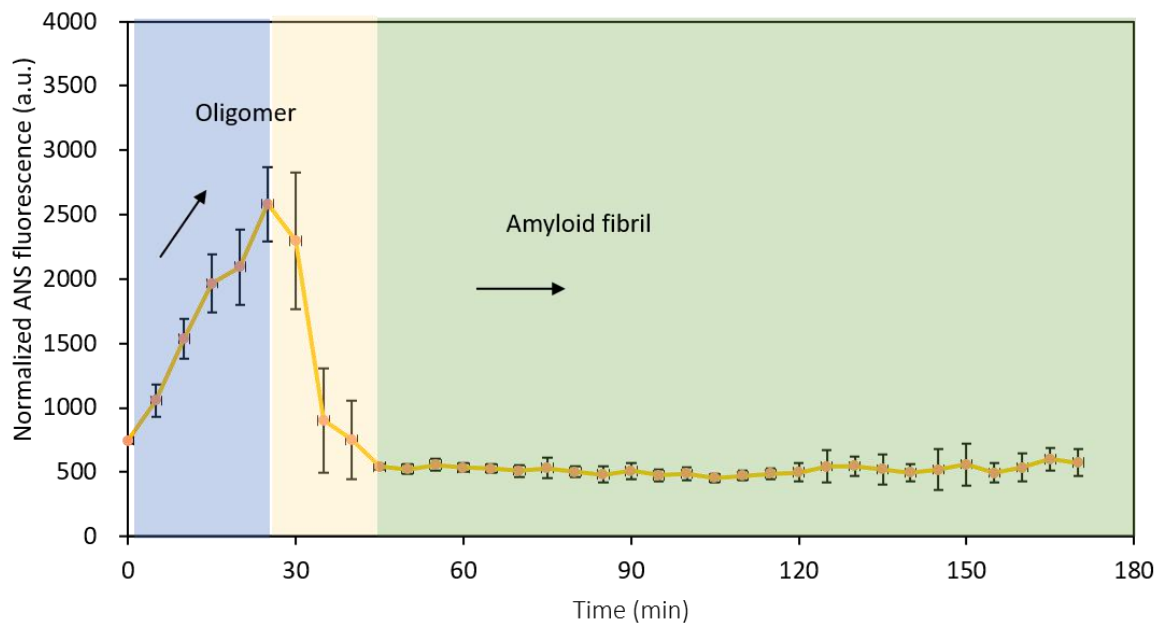

**Supplementary Fig. 12** | The ANS staining dynamic fibril growth curve of **R-M1**. ANS was added to an aqueous solution of **R-M1** (100  $\mu$ M) and fluorescence was measured immediately. The same experiment was carried out four times. The mean of results of four parallel experiments is shown and data were expressed as mean  $\pm$  SD (n=4).

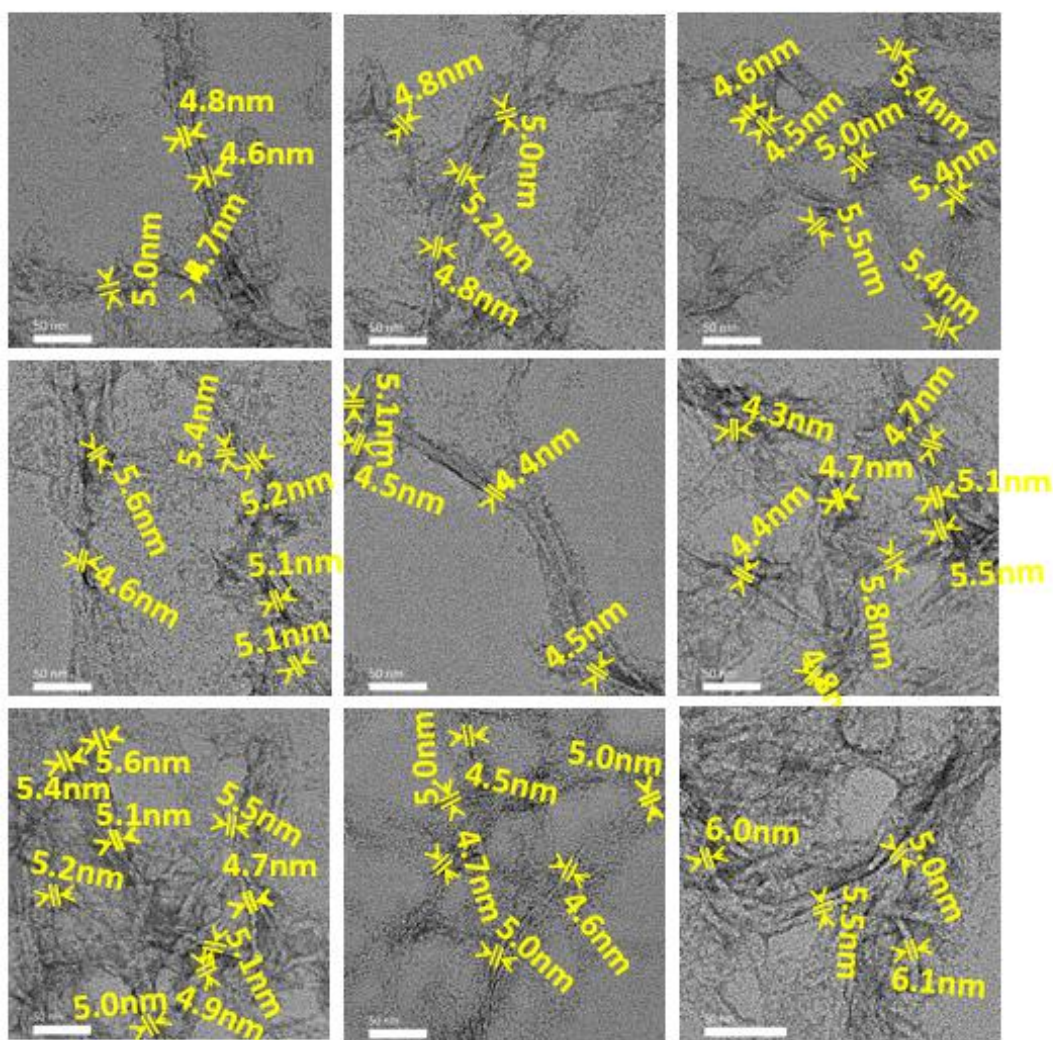

**Supplementary Fig. 13** | The TEM image of self-assembled  $\beta$ -sheet nanofibers of **M1** (100  $\mu$ M) after tailoring by FAP- $\alpha$  (50  $\mu$ M) in buffer for 12 h. Scale bar = 50 nm.

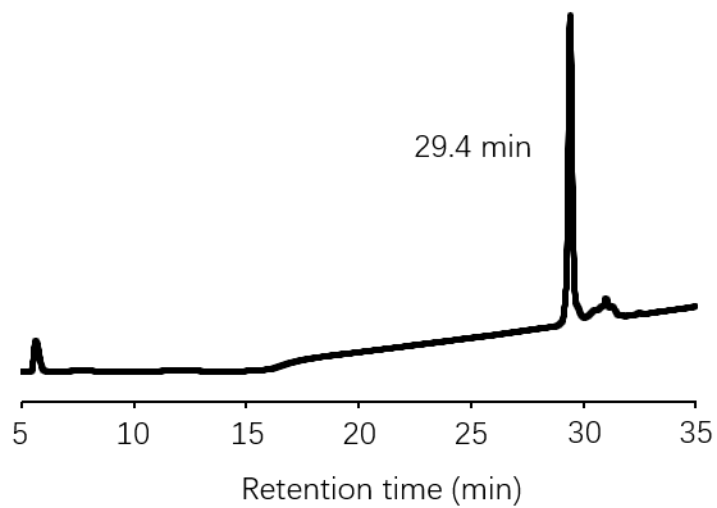

**Supplementary Fig. 14** | HPLC curve of **M3** co-incubated with inactivated FAP- $\alpha$  for 12h. The FAP- $\alpha$  was heat to 1 h to inactivate in advanced. HPLC: C18 column and a linear gradient of acetonitrile/water with 0.1% TFA from 10 %/ 90 % to 50 %/ 50 % and a flow speed of 1 mL/min in 35 min at 25 °C.

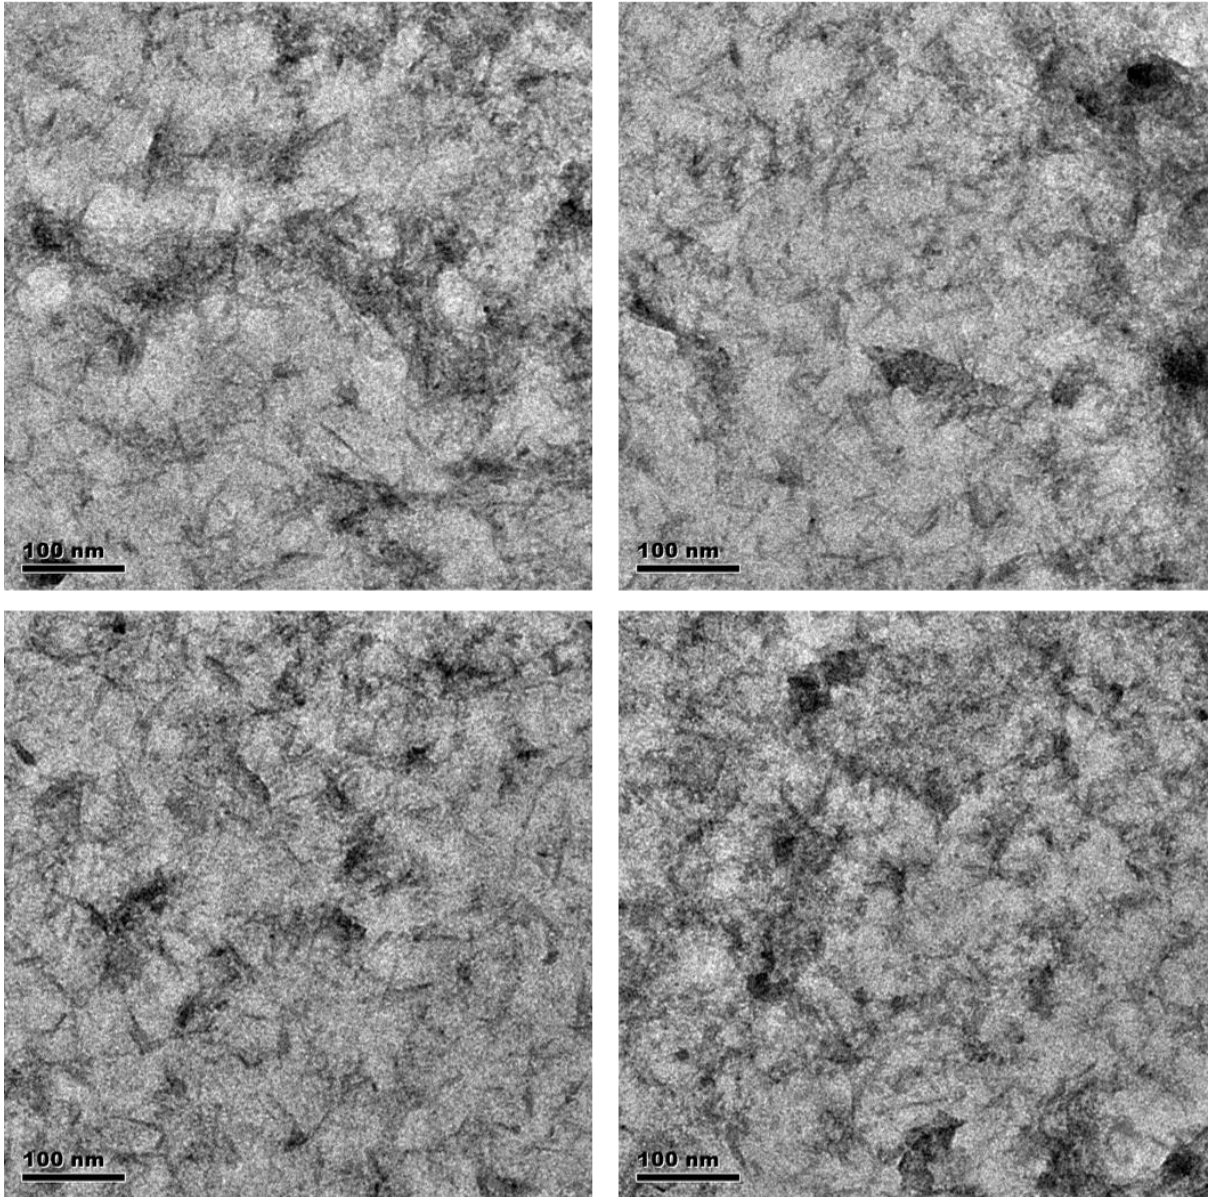

**Supplementary Fig. 15** | Representative TEM image of four independent experiments of **M1** (100  $\mu\text{M}$ ) co-incubated with Miapaca-2 cell lysis for 12 h. Scale bar: 100 nm.

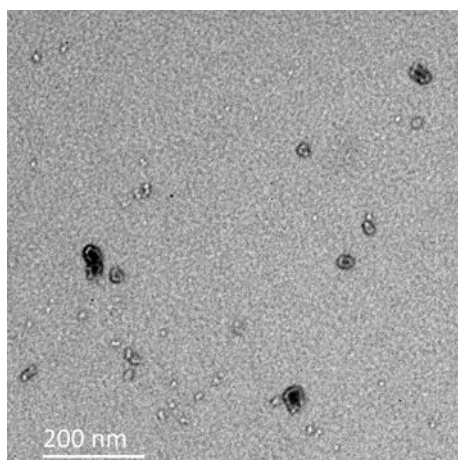

**Supplementary Fig. 16** | TEM image of **M1** (100  $\mu$ M) co-incubated with inactivated FAP- $\alpha$  (50  $\mu$ M) for 12h. The FAP- $\alpha$  was heat to 1 h to inactivate in advanced. Scale bar: 200 nm.

**M1+ Miapaca**

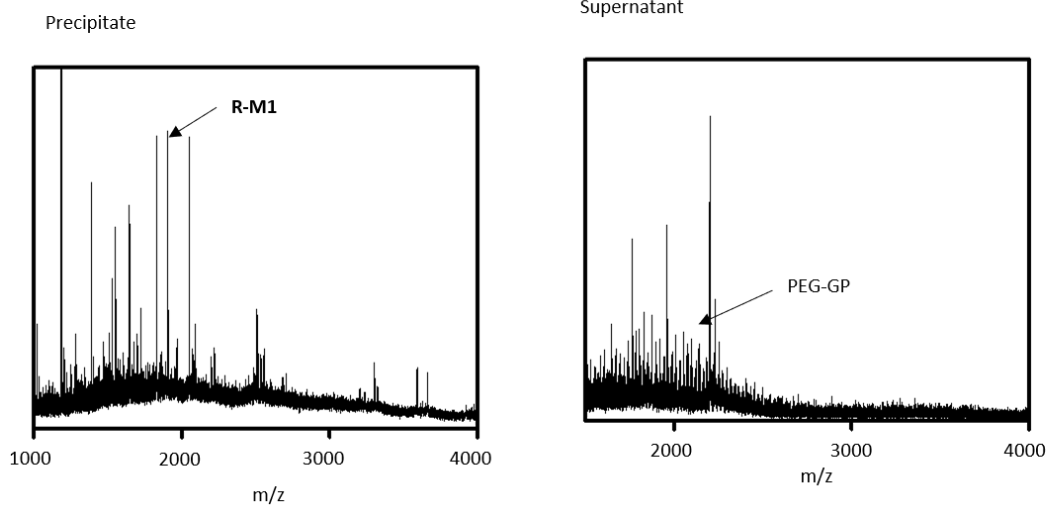

**Supplementary Fig. 17** | MALDI-TOF mass spectra of **M1** co-incubated with Miapaca-2 cell lysis for 2 h.

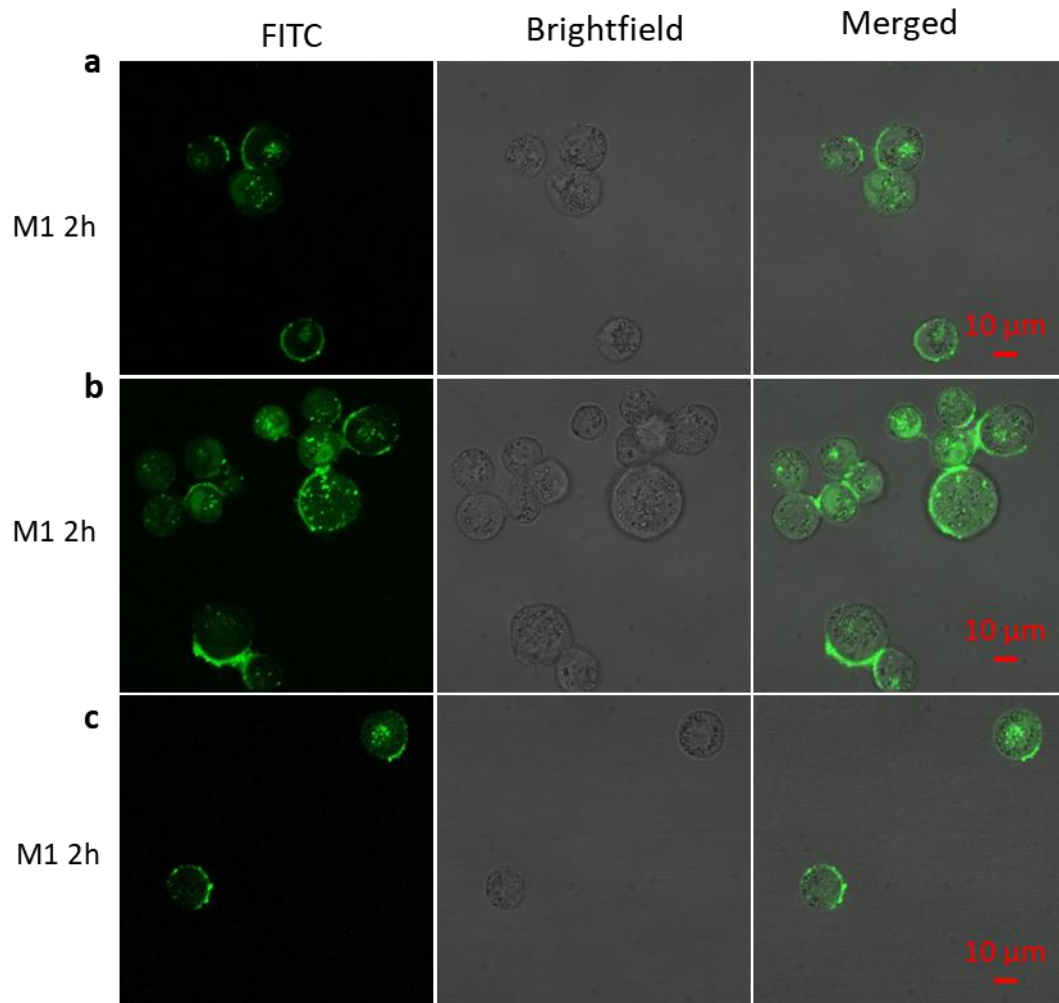

**Supplementary Fig. 18** | Representative confocal images in three independent experiments of **M1** (100  $\mu$ M) with BIVA effect on MiaPaca-2 cells after incubation for 2 h. Scale bar: 10  $\mu$ m.



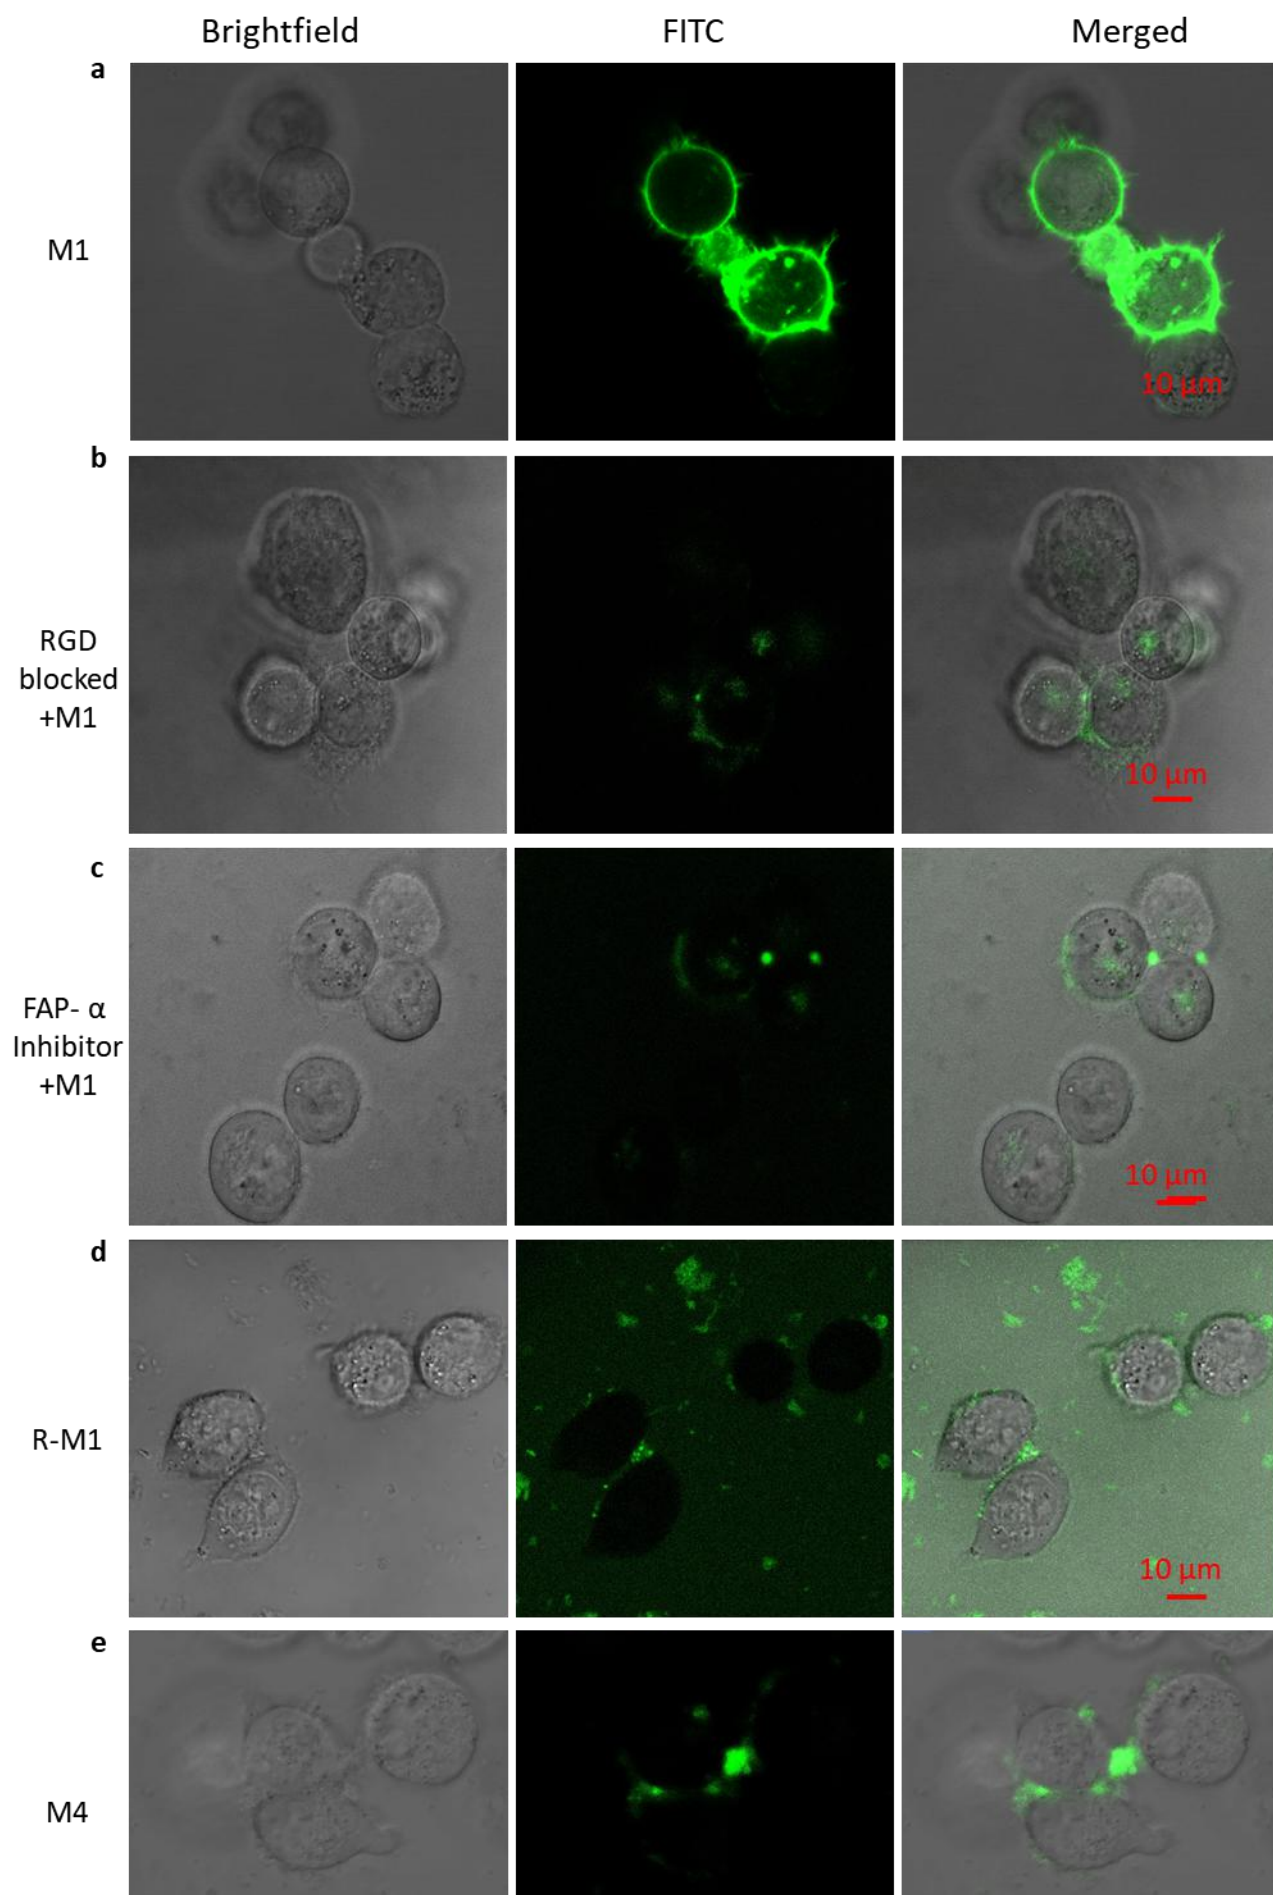



**Supplementary Fig. 19** | CLSM images of Miapaca-2 cells treated with different molecules or **M1** under different conditions. All the molecules are labelled with FITC. **a**, CLSM images of **M1** with BIVA effect on Miapaca-2 cells after incubation for 1 h. **b**, **M1** incubated on integrins blocked Miapaca-2 cells for 1 h and washed by fresh DMEM for three times (Miapaca-2 cells were treated by RGD for 1h at 50  $\mu$ M and washed by fresh DMEM for three times before adding **M1**). **c**, **M1** incubated on Fap- $\alpha$  inhibited Miapaca-2 cells for 1h and washed by fresh DMEM for three times (Miapaca-2 cells were treated by Fap- $\alpha$  inhibitor Ac-Gly-BoroPro for 1h at 50 nM and washed by fresh DMEM for three times before adding **M1**). **d**, **R-M1** incubated Miapaca-2 cells after incubation for 1 h without washing. **e**, **M4** incubated Miapaca-2 cells after incubation for 1 h and washed by fresh DMEM for three times. Green: FITC labelled molecules. Scale bar: 10  $\mu$ m.

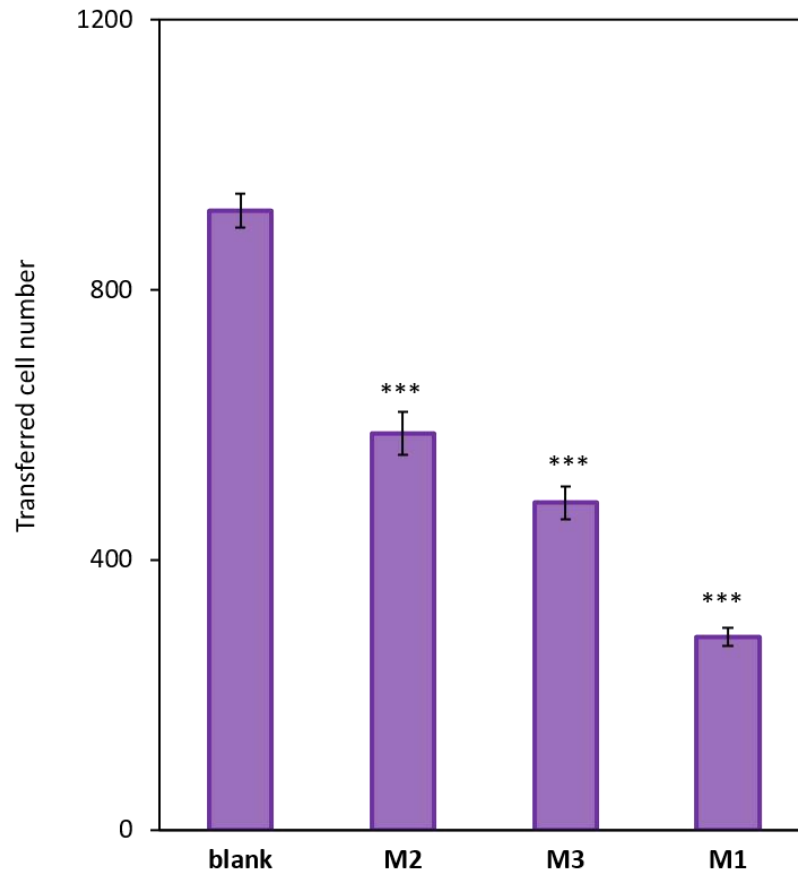

**Supplementary Fig. 20** | The quantitative results of the migrated cells after treatment of PBS (blank), **M2**, **M3** and **M1** (Fig 5g). The mean of results of five parallel experiments is shown and data were expressed as mean ± SD (n=5).  $p_{M1} = 5.85E-06$ ,  $p_{M2} = 5.94E-05$ ,  $p_{M4} = 3.16 E-04$ , Statistical analysis: one-way ANOVA followed by post hoc Tukey's test, \*\*\* $p < 0.001$ .

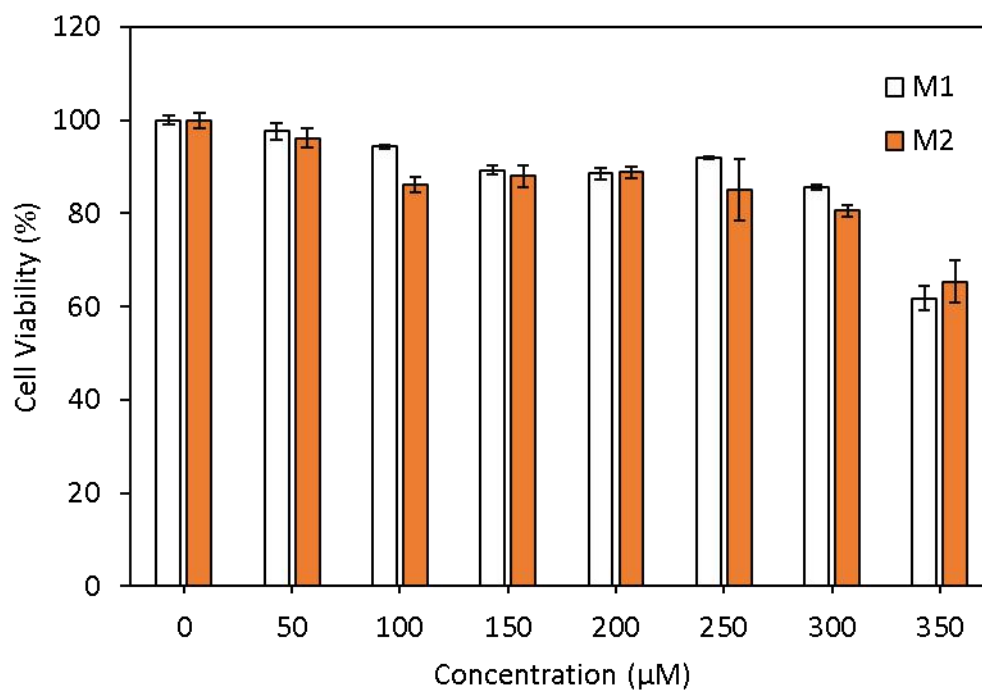

**Supplementary Fig. 21** | Cell viability assay of Miapaca-2 cells treated with a series concentration of **M1** and **M2** for 24 h. Tested by Cell Counting Kit-8 (Beyotime, C0039) The mean of results of six parallel experiments is shown and data were expressed as mean  $\pm$  SD (n=6).

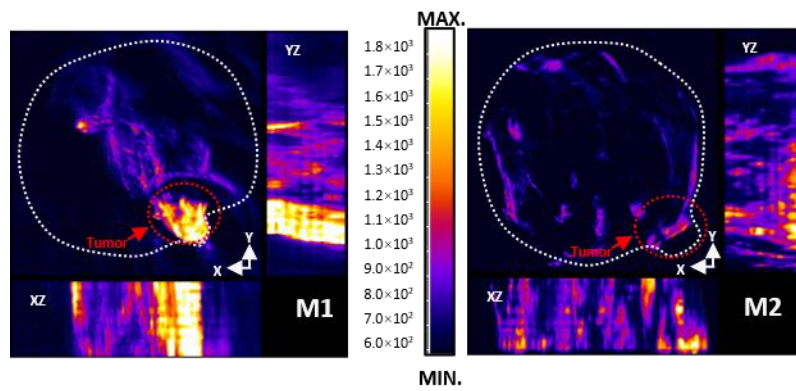

**Supplementary Fig. 22** | 3D reconstruction PA images of tumor-bearing mice injected with **M1** (16 mg/kg) through tail vein. PA images of mice were acquired with MOST (mode: MOST 128) at 12 h post injection.

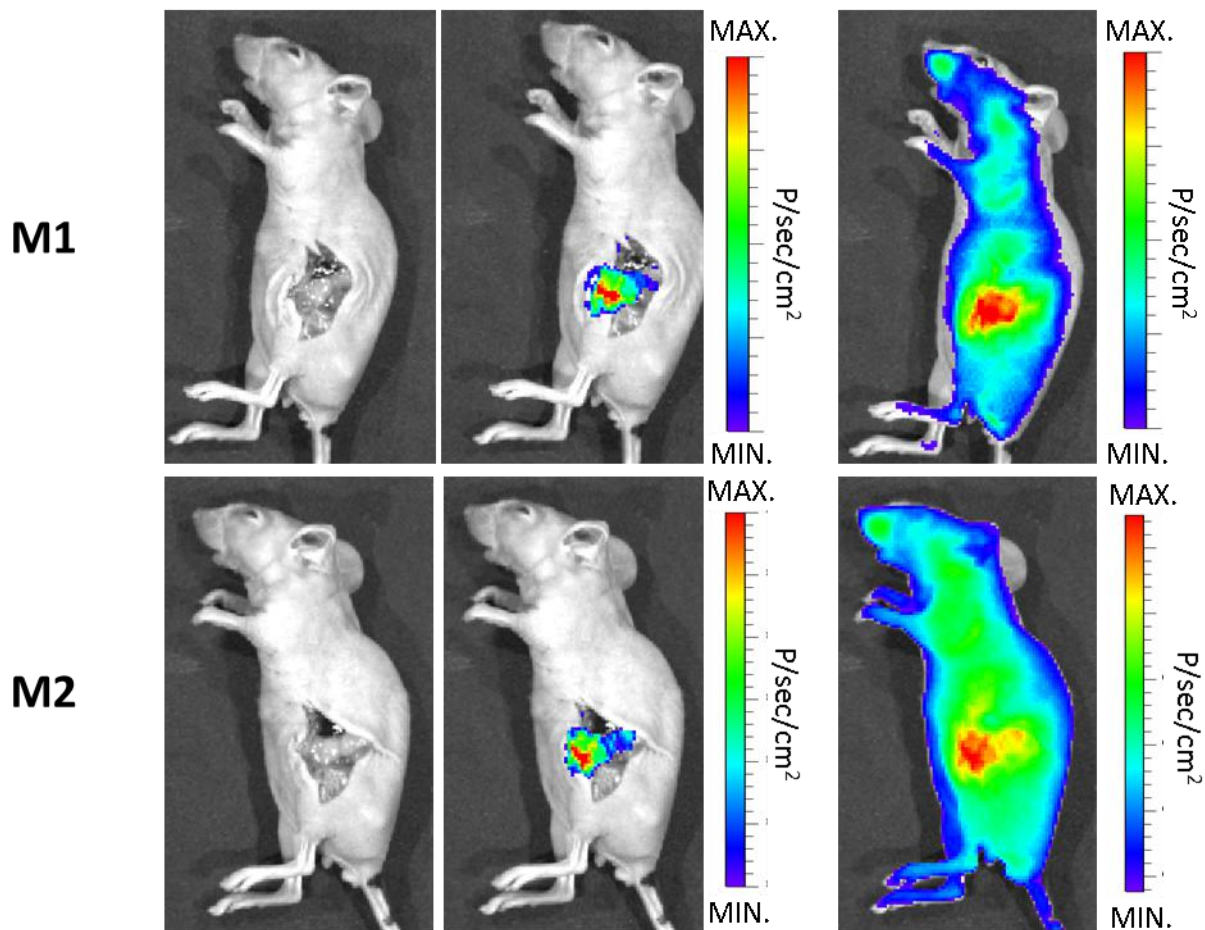

**Supplementary Fig. 23** | NIR fluorescence image of mice bearing MIA PaCa-2 cells after intravenous administration of ICG, M2 and M1 with a dose of 16 mg/kg (Fig. 7a).

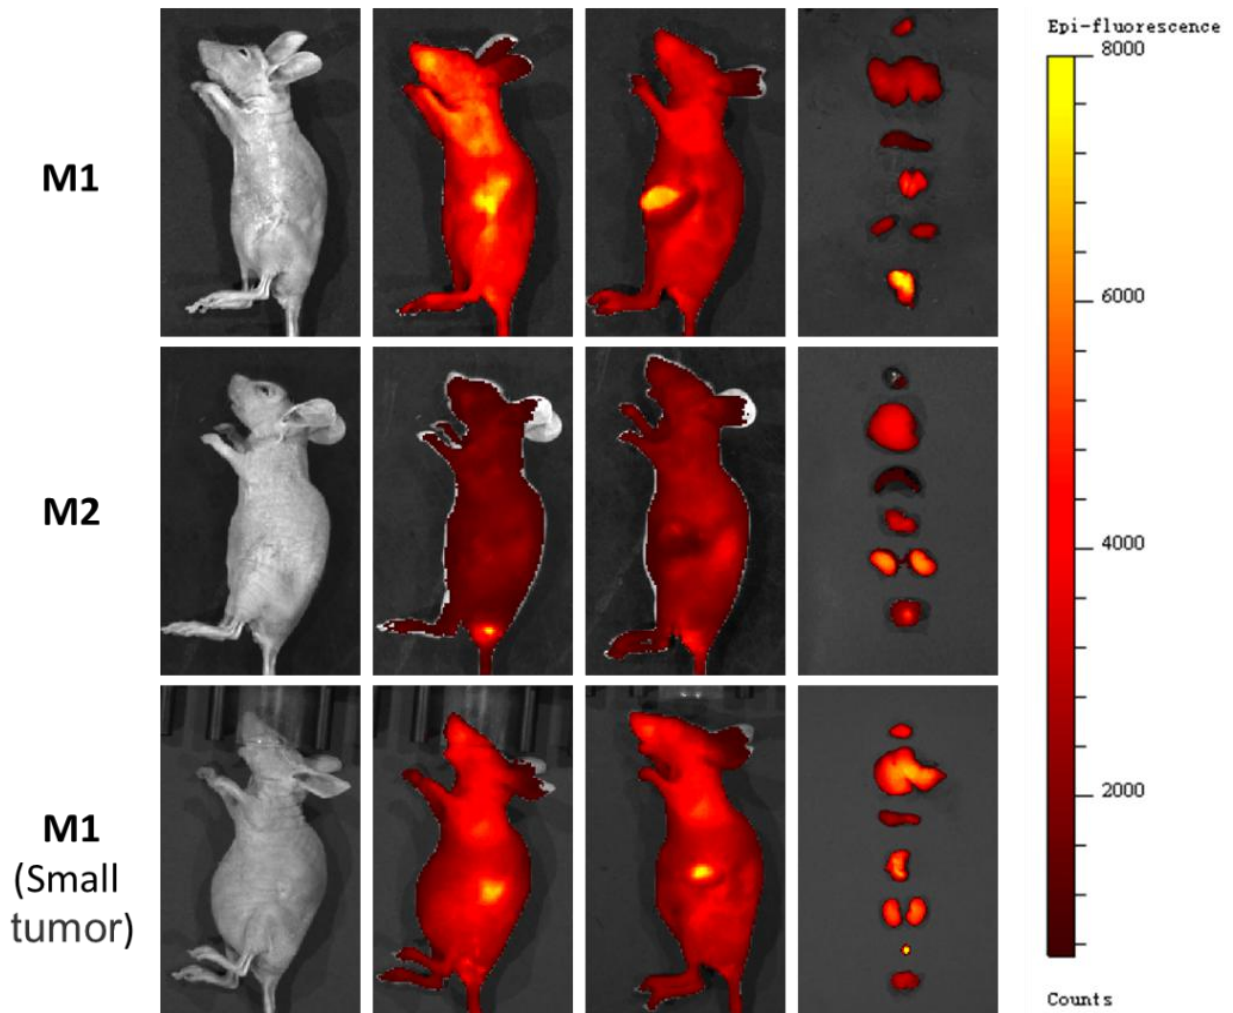

**Supplementary Fig. 24** | The *in vivo* and *in situ* NIR images of orthotopic pancreatic tumors by **M1** and **M2**, and the *ex vivo* of organ biodistribution including heart, liver, spleen, lung, kidney, and tumor after vein injection at 16mg/kg for 48 h.

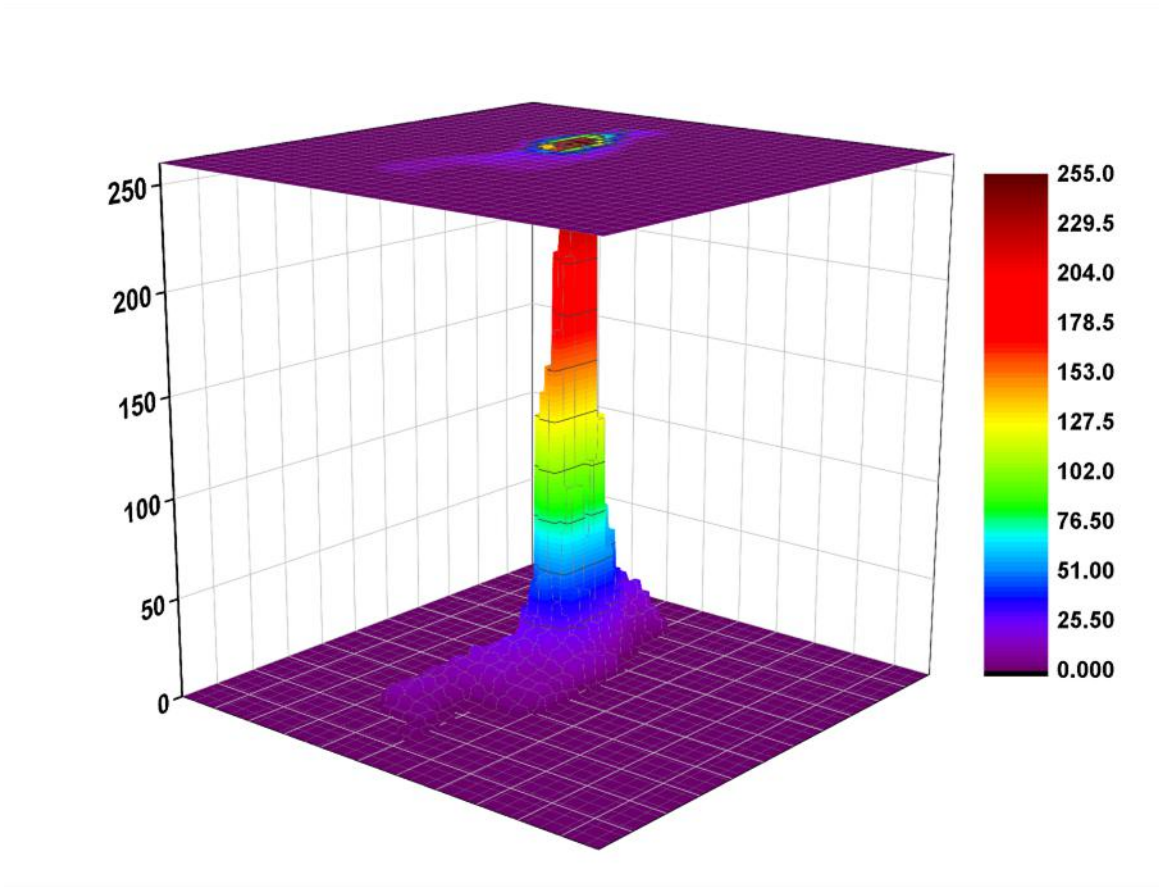

**Supplementary Fig. 25** | The 3D quantitative fluorescence intensity distribution of small size (~ 2 mm diameter) *ex vivo* orthotopic pancreatic tumor images of **M1** (Fig. 7d).

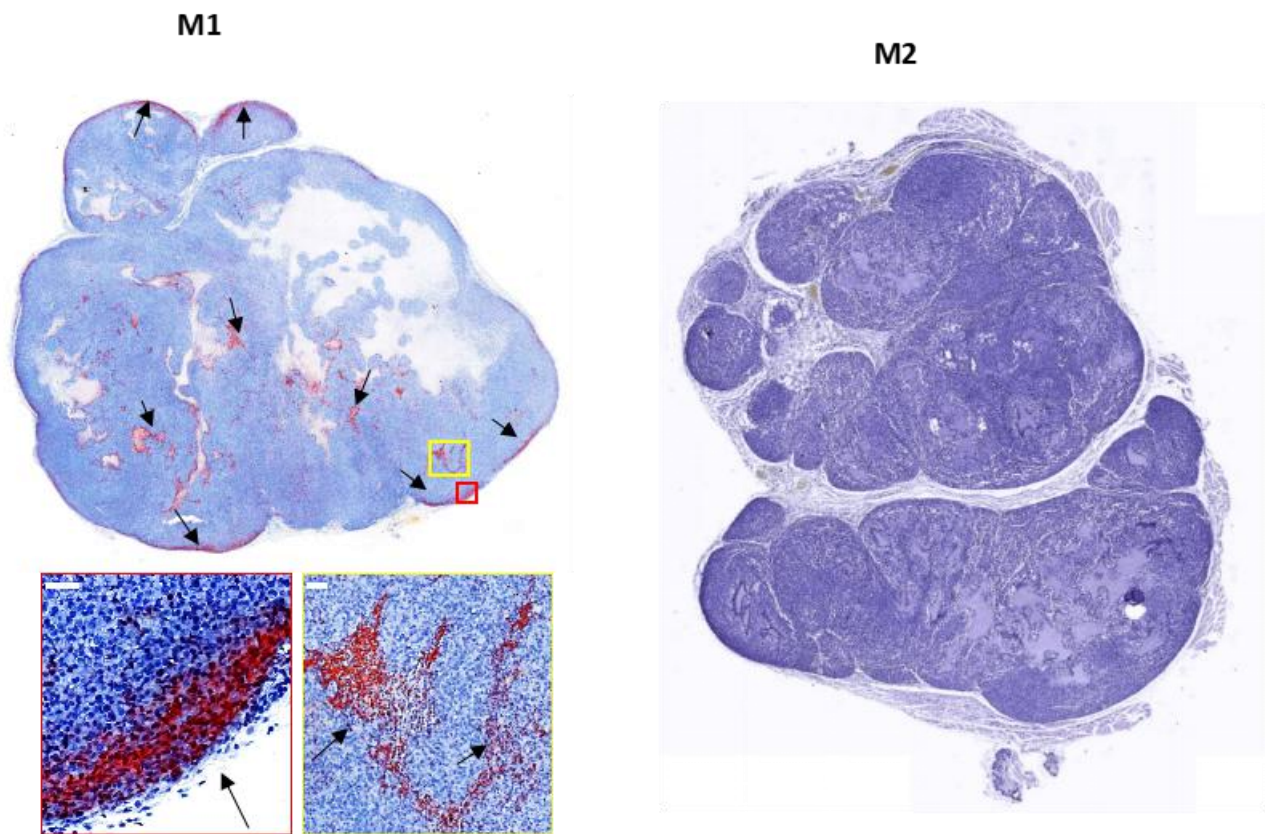

**Supplementary Fig. 26** | The whole tumor histologic section in mice treated with **M1** and **M2** (16 mg/kg) with congo red (red) stained assembled fibrils. Two enlarged images were respectively corresponded to the red and yellow box. Scale bar= 50  $\mu$ m.



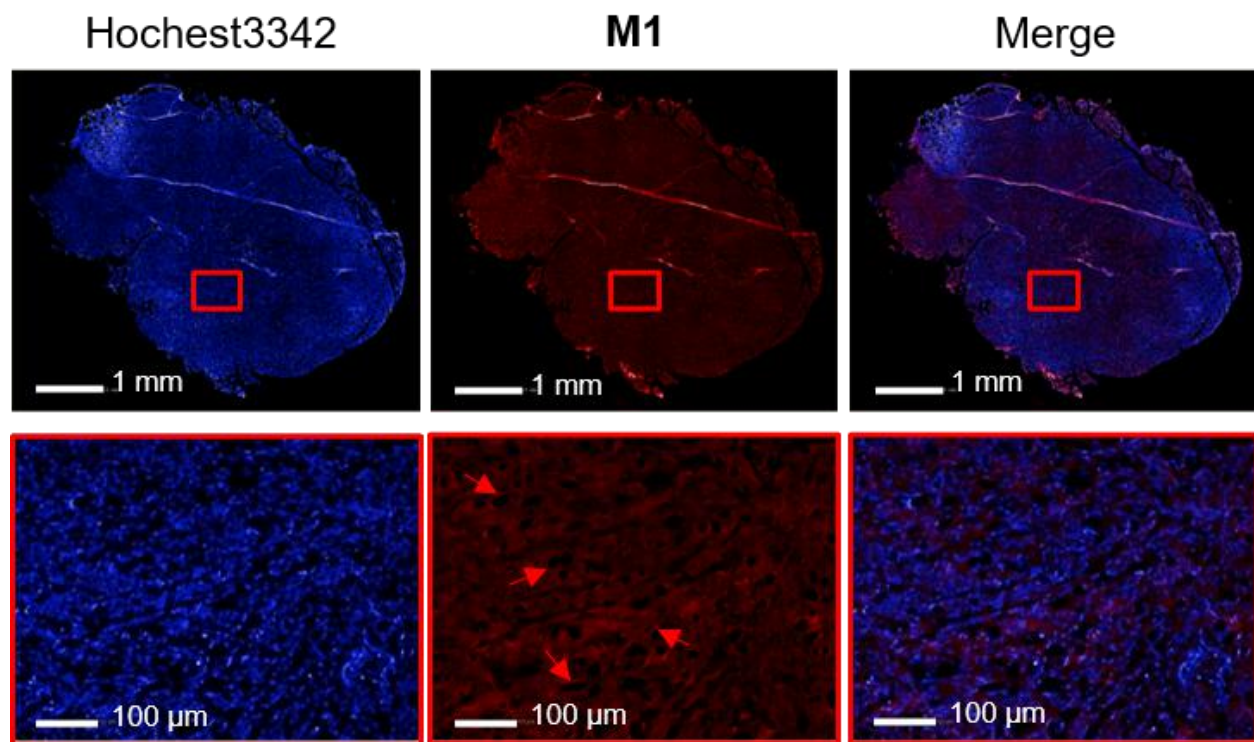

**Supplementary Fig. 27** | Fluorescence images of tumor histologic section treated with **M1** (16 mg/kg) for 48 h. Blue: Hochest 33342, Red: Cy3 labeled **M1**. Scale bar: shown in figure.

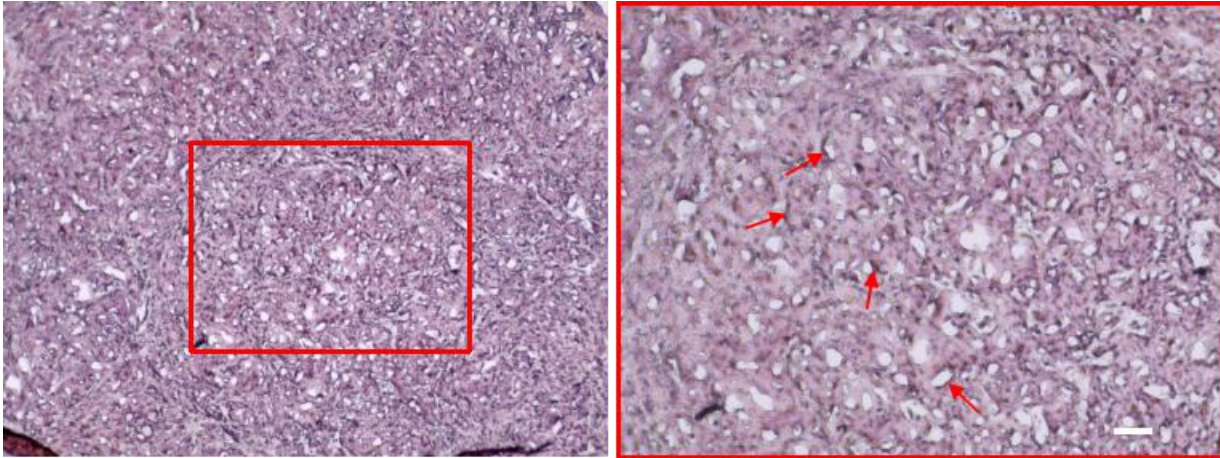

**Supplementary Fig. 28** | The tumor histologic section in mice treated with **M1** (16 mg/kg) for 48 h with congo red (red) stained assembled fibrils. A enlarged images were respectively corresponded to the red box. Scale bar: 100  $\mu$ m
